# Supplementary material
Source: Springer Nature journal article supplement (https://www.springermedizin.de/resource/supplementary/12879_2013_3001_MOESM7_ESM.pdf/9446396)

## A-No immunosuppressants or neutropenia

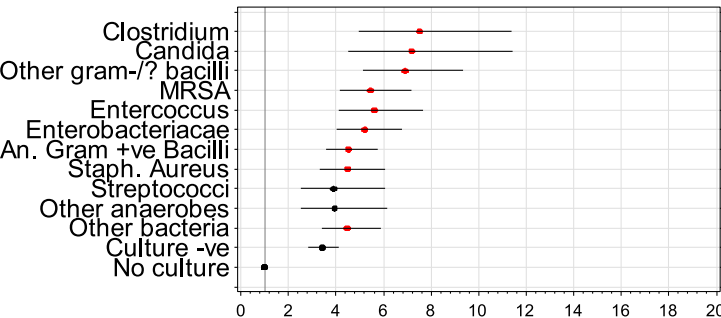

## B-With immunosuppressants and neutropenia

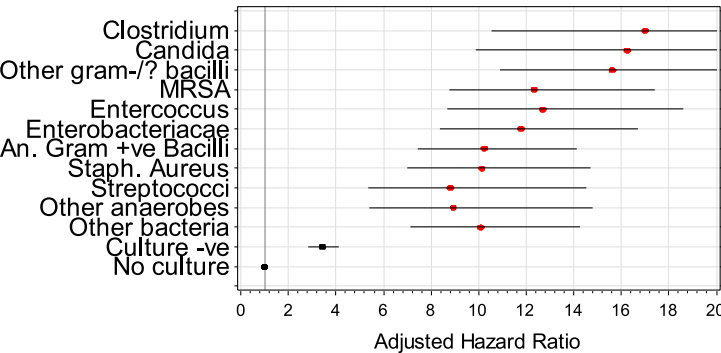

Supplement: MOESM7 [file 9446396]
